# Supplementary material
Source: publisher site journal article supplement (https://www.spandidos-publications.com/7177/downloadSupplementary)

Figure S1. Post-transduction protein levels of 14-3-3 $\gamma$ . Immunoblotting analysis of 14-3-3 $\gamma$  protein expression levels in H9C2 cells following pretreatment with pAd/14-3-3 $\gamma$ -shRNA or pAd/NC-shRNA, alongside the semi-quantification of the immunoblotting results.  $\beta$ -actin was used as an internal control (n=3). Data are presented as the mean  $\pm$  SD. \*P<0.05. shRNA, short hairpin RNA; NC, negative control.

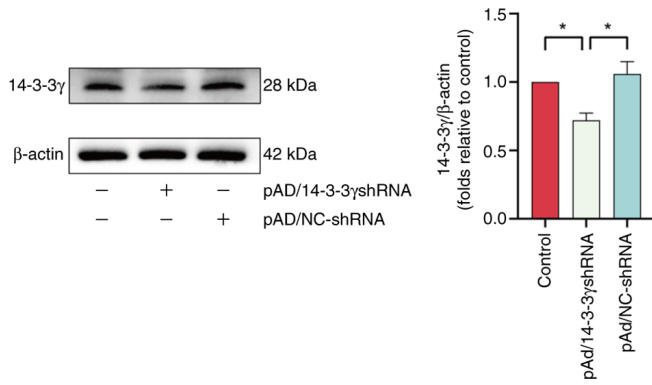

Figure S2. Underlying mechanism by which TQ protects against cardiac hypertrophy. TQ mitigates cardiac hypertrophy by promoting adaptive autophagy through the PPAR- $\gamma$ /14-3-3 $\gamma$  pathway. TQ, thymoquinone; AngII, angiotensin II; TAC, transverse aortic constriction; PPAR- $\gamma$ , peroxisome proliferator-activated receptor- $\gamma$ ; ROS, reactive oxygen species; NOX, NADPH oxidase 4; SOD2, superoxide dismutase 2.

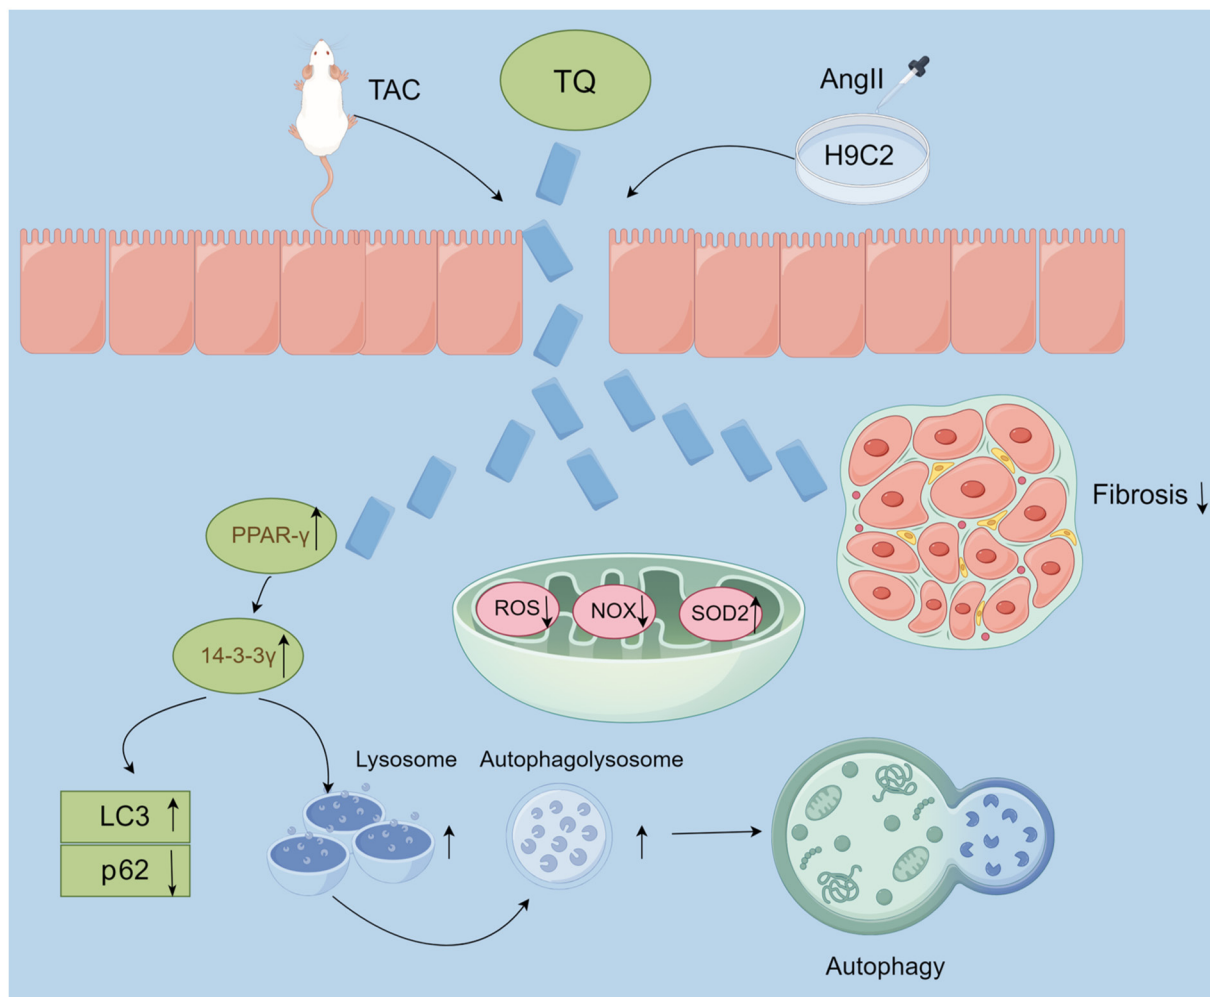

Supplement: Supplementary file 1 [file downloadSupplementary]
